## RESEARCH ARTICLE

# Association between pregnancy and severe COVID-19 symptoms in Qatar: A cross-sectional study

Alla' K. Al-Qassem<sup>1</sup> , Ammar B. Humaidi<sup>1</sup> , Amna K. Al-Kuwari<sup>1</sup> , Elham M. Hasan<sup>1</sup> , Nosaiba H. Yakti<sup>1</sup> , Rakan M. Al-Hathal<sup>1</sup> , Devendra Bansal<sup>2</sup>, Elmoubashar Abu Baker Abd Farag<sup>2</sup> , Hamad E. Al-Romaihi<sup>2</sup>, Mohammed H. J. Al-Thani<sup>2</sup>, Omran A. H. Musa<sup>2</sup>, Suhail Doi<sup>1</sup>, Tawanda Chivese<sup>1</sup> \*

**1** College of Medicine, QU Health, Qatar University, Doha, Qatar, **2** Department of Public Health, Ministry of Public Health, Doha, Qatar

 These authors contributed equally to this work.

\* [tchivese@qu.edu.qa](mailto:tchivese@qu.edu.qa)

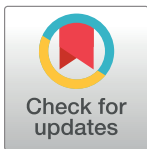

## Abstract

There is inconclusive evidence whether pregnancy exacerbates COVID-19 symptoms or not, and scarce data from the Middle East and North Africa region. The aim of this study was to investigate the association between pregnancy and COVID-19 symptoms in Qatar. This cross-sectional study was carried out using data of all women with confirmed COVID-19, comparing women of child-bearing age (18–49 years). Data of all COVID-19 cases were collected by the Ministry of Public Health (MoPH) in Qatar, between March and September 2020. Symptoms were compared by pregnancy status and classified into moderate and severe. Multivariable logistic and Poisson regression was carried out to investigate the association between pregnancy and severity of COVID-19 symptoms. During the study period, 105 744 individuals were diagnosed with COVID-19, of which 16 908 were women of childbearing age. From that sample, 799 women were pregnant (mean age 29.9 years (SD 5.2)) and 16109 women were not pregnant (mean age 33.1 years (SD 7.8)). After multivariable logistic regression, pregnancy was associated with 1.4-fold higher odds of reporting any symptoms of COVID-19 (OR 1.41, 95% CI 1.18–1.68), and 1.3-fold higher odds of reporting shortness of breath (OR 1.29, 95% CI 1.02–1.63). In a multivariable Poisson regression, pregnancy was also associated with a higher count of symptoms (IRR 1.03, 95%CI 0.98–1.08), although with weak evidence against the null hypothesis. Our findings suggest that, in this setting, pregnant women are more likely to have symptomatic COVID-19, and shortness of breath, compared to women with no pregnancy.

## OPEN ACCESS

**Citation:** Al-Qassem AK, Humaidi AB, Al-Kuwari AK, Hasan EM, Yakti NH, Al-Hathal RM, et al. (2023) Association between pregnancy and severe COVID-19 symptoms in Qatar: A cross-sectional study. *PLOS Glob Public Health* 3(10): e0000891. <https://doi.org/10.1371/journal.pgph.0000891>

**Editor:** Julia Robinson, PLOS: Public Library of Science, UNITED STATES

**Received:** July 18, 2022

**Accepted:** September 27, 2023

**Published:** October 23, 2023

**Copyright:** © 2023 Al-Qassem et al. This is an open access article distributed under the terms of the [Creative Commons Attribution License](https://creativecommons.org/licenses/by/4.0/), which permits unrestricted use, distribution, and reproduction in any medium, provided the original author and source are credited.

**Data Availability Statement:** All underlying data are available at [10.6084/m9.figshare.22771661](https://doi.org/10.6084/m9.figshare.22771661).

**Funding:** The authors received no specific funding for this work.

**Competing interests:** The authors have declared that no competing interests exist.

## Introduction

Pregnant women may be at greater risk of acquiring infectious diseases and having severe disease, due to the physiological and immunological changes which occur during pregnancy, that can impair the immune system [1]. Based on this, there are reasonable concerns that COVID-

19 could be severe during pregnancy and possibly cause adverse pregnancy outcomes [2]. A severe course of COVID-19 may result in adverse pregnancy outcomes such as stillbirths and maternal deaths [3]. It may therefore be necessary to prioritize protections for pregnant women if they are at higher risk of severe COVID-19.

Although mounting evidence suggests that pregnant women are more susceptible to severe COVID-19, findings on the association between pregnancy and the severity of COVID-19 symptoms are not conclusive. One systematic review and a meta-analysis, with studies up to April 2021, found that pregnant women were at a greater risk of requiring ventilatory support or becoming admitted to an intensive care unit (ICU), in comparison to women of childbearing age with no pregnancy [4]. Another meta-analysis showed an increased risk of severe COVID-19 and a worse symptom profile in pregnant women [5]. In contrast, one systematic review, with studies up to May 2020, found no association between COVID-19 severity, assessed using symptoms and pregnancy. In this review, most pregnant women had mild symptoms, and the clinical presentation of pregnant women was similar to that of the general population [6]. Similarly, another systematic review also reported that certain symptoms such as cough, fatigue, sore throat, headache, and diarrhea to be less probable in pregnant than in women with no pregnancy [7]. The last two reviews demonstrate conflicting findings on the association between pregnancy and COVID-19 symptoms, suggesting a need for more research on this topic. These reviews also did not include studies from the Middle East and North Africa Region. Further, to the best of our knowledge, prior to this study, we found no studies on the association between COVID-19 symptoms and pregnancy in Middle Eastern populations.

There are some suggestions that COVID-19 may become endemic or seasonal, and to have a more benign course due to the high levels of population immunity, because of widespread vaccinations and high proportions of people with prior infection [8]. However, there are still individuals who are at risk of severe symptomatic COVID-19, either because of comorbidities, advanced age or due to the development of new variants of the disease [9]. Certain symptoms such as shortness of breath have been shown to be prognostic for severe COVID-19. For instance, one study showed that shortness of breath was associated with 2.4-folds odds of severe COVID-19 [10]. Other symptoms have also been shown to be associated with severe COVID-19 although the data are inconclusive [11]. Further, it is likely that a higher symptoms count could imply a worse disease profile, however, there is little research on this.

This study investigated the association between pregnancy and COVID-19 symptoms in a Middle Eastern population where such data have been scarce to date. The primary objective of this study was to compare COVID-19 symptomatic status between women with and without pregnancy. We also compared individual symptoms between groups of women with and without pregnancy, as well as within age groups.

## Materials and methods

### Design and setting

This study was a cross-sectional study of women of childbearing age with confirmed COVID-19 using data collected by the Ministry of Public Health (MoPH) in Qatar during the period of March to September 2020. During the study period, the MoPH collected data on all confirmed cases of COVID-19, irrespective of disease severity. COVID-19 was diagnosed by reverse transcriptase polymerase chain reaction (RT-PCR), and screening was done through several ways, including mandatory contact tracing and testing of all arrivals into the country and individuals with symptoms. Symptomatic status was evaluated across two groups, women with or without pregnancy. Additionally, in both groups individual symptoms were compared and categorized

into mild to moderate and severe classes of symptoms according to a modified version of the criteria proposed by the National Institutes of Health (NIH) of the United States [12]. The study is reported following the Strengthening the Reporting of Observational Studies in Epidemiology (STROBE) (S1 Text).

### Study participants

The population of Qatar consists of a large heterogeneous multinational population of which expatriates form the majority, around 90%, and the remainder are local [13]. This population was also reflected in the confirmed cases of COVID-19 from the MoPH. For this study, participants were eligible if they were women aged between 18 to 49 years of age and if they had confirmed COVID-19 by RT-PCR. We excluded individuals below 18 years or above 49 years of age and women in the postpartum period, defined as within 6 weeks after birth.

### Data collection

From the MoPH dataset, we selected data for each participant which included symptoms of COVID-19, pregnancy status, sociodemographic data such as age, nationality, marital status, month of diagnosis, number of symptoms and comorbidities. The data on symptoms were collected by telephonic interview by the MoPH. Each individual was asked about presence of respiratory symptoms, such as cough, sore throat, and shortness of breath, gastrointestinal symptoms, such as diarrhea and abdominal pain, musculoskeletal symptoms that included muscle or joint pain, and systemic symptoms which consisted of fever, headache, and chills. The symptoms were classified into two categories, one for mild to moderate, which included fever, cough, sore throat, headache, muscle or joint pain, diarrhea, chills, or abdominal pain, but not shortness of breath, and another for severe symptoms, which was made up of shortness of breath. The severity categories were then compared between women without pregnancy and with pregnancy. We also compared individual symptoms by pregnancy status, and, further, compared both severity categories and individual symptoms by pregnancy status but within the age groups of 18–29 years, 30–39 years, and 40–49 years of age. Further, we categorized individual symptoms into organ systems and compared frequency across the three age groups.

### Statistical analysis

The categorical data were summarized as frequencies and percentages, whereas age was normally distributed and therefore summarized using mean and standard deviation (SD). To compare the categorical data by pregnancy status, the chi-squared ( $\chi^2$ ) test was utilized, and the t-test was used to compare mean age. We utilized literature and directed acyclic graphs (S1 Fig) to identify potential confounders to adjust for in the association between pregnancy and COVID-19, and in this case, only age appeared to meet the confounding criteria [14–16]. We also adjusted for diabetes, cardiovascular disease (CVD), and region of origin as these have been shown to be prognostic for severe COVID-19 [17, 18]. We compared individual symptoms and symptom categories using the chi-squared test. Multivariable logistic regression was then carried out to assess the association between pregnancy and the severity of COVID-19 symptoms, adjusted for age, diabetes, CVD, and region of origin (with Asia as the reference). We carried out two models, the first model with the outcome being any symptomatic COVID-19 compared to no symptoms, the second model with the outcome being shortness of breath compared to no symptoms. The odds ratios (OR), 95% confidence intervals (95% CI), and exact p-values were reported. We tested model specification using the link test and model fit using the area under the receiver operating curve (ROC curve). To control for the effect of age,

we carried out a stepwise logistic model with COVID-19 symptoms (yes/no) as the outcome, but age was dropped from this model and therefore not considered in the final analysis. Further, we carried out multivariable Poisson regression with the outcome being the count of symptoms and the exposure being pregnancy and adjusted for the same confounders. All analyses were carried out in Stata version 16 [19].

## Ethics approval

Ethics approval and waiver of informed consent were approved by the MoPH (ERC-826-3-2020), and all data were de-identified before the analysis.

## Results

### Characteristics of included participants

A total of 105 744 individuals were diagnosed with COVID-19 during the study period. From these, 17 610 were women of childbearing age. After exclusion of women in post-partum and those who were aged less than 18 years, 799 pregnant and 16 109 women without pregnancy were included (Fig 1). The characteristics of the included participants, by pregnancy status, are shown in Table 1.

The mean age of the included women was 33.0 years (SD 7.7), with most of the individuals being aged between 30–39 years (42.7%) and 18–29 years (35.1%) (Table 1). Pregnant women were slightly younger than those without pregnancy (mean 29.9 years (SD 5.2) vs 33.1 years (SD 7.8), respectively,  $p < 0.01$ ). Most of the women were from countries in the Asia (47.9%), followed by countries in Middle East & North Africa (45.8%). Most of the participants were diagnosed in the months of June and August (28.3% and 19.2%, respectively). There were

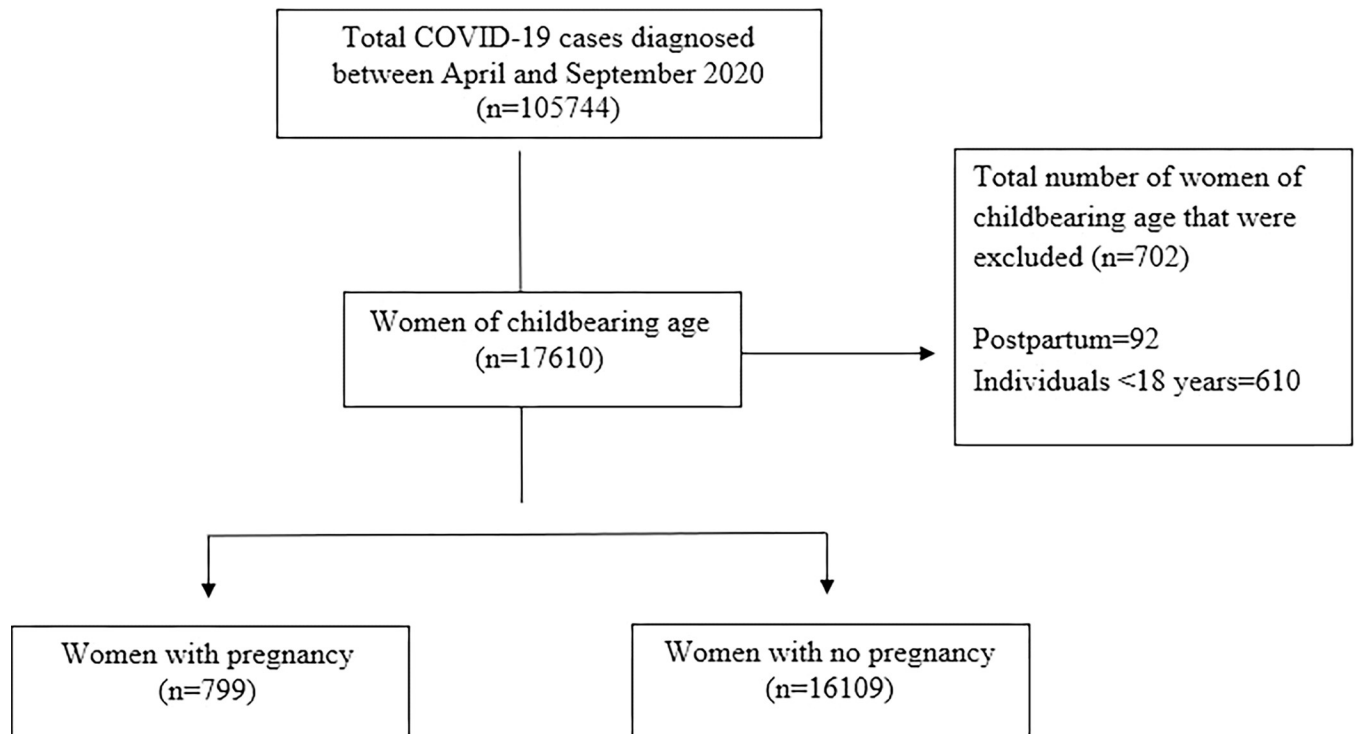

**Fig 1. Study flow chart.** Figure showing the flow of participants in the study.

<https://doi.org/10.1371/journal.pgph.0000891.g001>

**Table 1. Characteristics of participants by pregnancy status.**

| Variable                  |                            | Overall, n = 16908 | Pregnant, n = 799 | No pregnancy, n = 16109 | P-value |
|---------------------------|----------------------------|--------------------|-------------------|-------------------------|---------|
| Age, years                | Mean (SD)                  | 33.0 (7.7)         | 29.9 (5.2)        | 33.1 (7.8)              | <0.001  |
| Age groups, n (%)         |                            |                    |                   |                         | <0.001  |
|                           | 18–29 years                | 5929 (35.1)        | 380 (47.6)        | 5549 (34.4)             |         |
|                           | 30–39 years                | 7224 (42.7)        | 393 (49.2)        | 6831 (42.4)             |         |
|                           | 40–49 years                | 3755 (22.2)        | 26 (3.2)          | 3729 (23.1)             |         |
| Region of origin, n (%)   |                            |                    |                   |                         | <0.001  |
|                           | Asia                       | 8105 (47.9)        | 290 (36.3)        | 7815 (48.5)             |         |
|                           | Middle east & north Africa | 7746 (45.8)        | 477 (59.7)        | 7269 (45.1)             |         |
|                           | Sub-Saharan Africa         | 767 (4.5)          | 22 (2.8)          | 745 (4.6)               |         |
|                           | North America & Europe     | 255 (1.5)          | 8 (1.0)           | 247 (1.5)               |         |
|                           | Australasia                | 13 (0.1)           | 0 (0.0)           | 13 (0.1)                |         |
|                           | South America              | 21 (0.1)           | 2 (0.2)           | 19 (0.1)                |         |
| Marital status, n (%)     |                            |                    |                   |                         | <0.001  |
|                           | Married                    | 5917 (35.0)        | 487 (60.9)        | 5427 (33.7)             |         |
|                           | Single                     | 1763 (10.4)        | 5 (0.6)           | 1758 (10.9)             |         |
|                           | Divorced/widowed           | 77 (0.5)           | 0 (0.0)           | 9 (0.1)                 |         |
|                           | Not applicable             | 9144 (54.1)        | 295 (36.9)        | 2069 (12.8)             |         |
|                           | Others                     | 9 (0.1)            | 0 (0.0)           | 9 (0.1)                 |         |
| Month of diagnosis, n (%) |                            |                    |                   |                         | <0.001  |
|                           | April                      | 546 (3.2)          | 35 (4.4)          | 511 (3.2)               |         |
|                           | May                        | 2816 (16.7)        | 174 (21.8)        | 2642 (16.4)             |         |
|                           | June                       | 4780 (28.3)        | 202 (25.3)        | 4578 (28.4)             |         |
|                           | July                       | 2468 (14.6)        | 128 (16.0)        | 2340 (14.5)             |         |
|                           | August                     | 3244 (19.2)        | 139 (17.4)        | 3105 (19.3)             |         |
|                           | September                  | 3054 (18.1)        | 121 (15.1)        | 2933 (18.2)             |         |
| Number of symptoms        | Medium (IQR)               | 2 (0–3)            | 2 (0–3)           | 2 (0–3)                 | 0.0138  |
| Comorbidities, n(%)       |                            |                    |                   |                         |         |
|                           | Cardiovascular Disease     | 537 (3.2)          | 12 (1.5)          | 525 (3.3)               | 0.006   |
|                           | Diabetes                   | 601 (3.6)          | 60 (7.5)          | 541 (3.4)               | <0.001  |
| Death, n (%)              |                            | 3 (0.02)           | 0 (0.0)           | 3 (0.02)                |         |

\*Column percentages are reported

\*Values are numbers (percentages) unless stated otherwise.

Table with demographic information of participants in the study by pregnancy status. Column percentages are reported, and values are numbers (percentages) unless stated otherwise.

<https://doi.org/10.1371/journal.pgph.0000891.t001>

three deaths (0.02%), all in women with no pregnancy during the study period. The first case was of a 43-year-old lady with diabetes who had dyspnea, cough, and fever. The second case was of a 48-year-old with no comorbidities who had fever alone. The third case was of a 25-year-old with no comorbidities who had fever only.

### Comparison of symptoms between women with and without pregnancy

Table 2 compares COVID-19 symptoms between pregnant women and women with no pregnancy. Overall, the proportion of symptomatic COVID-19 was higher in the pregnancy group compared to the group of women without pregnancy (78.3% vs 70.5%, respectively,  $p < 0.001$ ), with strong evidence against the null hypothesis. In terms of individual symptoms, compared to women without pregnancy, a significantly higher proportion of pregnant women reported

**Table 2. Comparison of severity of symptoms between by pregnancy status.**

| Variable, n(%)                       | Pregnant women, n = 799 | No pregnancy, n = 16109 | P value |
|--------------------------------------|-------------------------|-------------------------|---------|
| Asymptomatic, n = 4920               | 173(21.7)               | 4747(29.5)              | <0.001  |
| Symptomatic, n = 11988               | 626(78.3)               | 11362(70.5)             | <0.001  |
| Mild to moderate symptoms, n = 10628 |                         |                         |         |
| Fever                                | 301(42.2)               | 6078(41.0)              | 0.53    |
| Cough                                | 266(37.3)               | 4882(32.9)              | 0.016   |
| Sore throat                          | 171(23.9)               | 3587(24.2)              | 0.89    |
| Headache                             | 234(32.8)               | 4644(31.3)              | 0.41    |
| Muscle or joint pain                 | 211(29.6)               | 3905(26.3)              | 0.056   |
| Diarrhoea                            | 31(4.3)                 | 855(5.8)                | 0.11    |
| Chills                               | 57(8.0)                 | 1069(7.2)               | 0.43    |
| Abdominal pain                       | 49(6.9)                 | 842(5.7)                | 0.18    |
| Severe group n = 1360                |                         |                         |         |
| Shortness of breath                  | 85(10.6)                | 1275(7.9)               | 0.006   |

Table comparing COVID-19 symptoms between pregnant women and women with no pregnancy. The symptoms are classified into two categories, mild to moderate, which included fever, cough, sore throat, headache, muscle or joint pain, diarrhea, chills, or abdominal pain, but not shortness of breath, and severe symptoms, which was made up of shortness of breath.

<https://doi.org/10.1371/journal.pgph.0000891.t002>

shortness of breath (10.6% vs 7.9%, respectively,  $p = 0.006$ ) and cough (37.3% vs 32.9%,  $p = 0.016$ ). No significant differences were observed between women with and without pregnancy across the other symptoms.

### Comparison of symptoms by pregnancy status within age groups

Table 3 shows a comparison of COVID-19 symptoms by pregnancy across different age categories. Overall, the proportion of symptomatic COVID-19 was significantly higher in pregnant compared to women with no pregnancy in the age groups of 18–29 years (76.5% vs 69.6%, respectively,  $p < 0.001$ ), and 30–39 years (78.1% vs 70.8%, respectively,  $p = 0.002$ ). Shortness of breath was also reported by a higher proportion of pregnant women compared to women with no pregnancy in the age group of 18–29 years (13.2% vs 7.4%, respectively,  $p < 0.001$ ). With regards to mild to moderate symptoms, most symptoms were similar across both groups in the age categories, with a few exceptions. These included cough (38.2% vs 32.7%, respectively,  $p < 0.040$ ) and muscle or joint pain (29.7% vs 24.3%, respectively,  $p = 0.029$ ) which were greater in pregnant women compared to women without pregnancy in the age group of 18–29 years, respectively. Additionally, sore throat was more common in pregnant women than women without pregnancy in the age group 30–39 years (28.3% vs 23.3%, respectively,  $p = 0.030$ ). However, in the age group of 18–29 years, sore throat was of greater proportion in women without pregnancy compared to pregnant women in the age group of 18–29 years (25.7% vs 19.1%, respectively,  $p = 0.008$ ). Additionally, fever was more frequent in women with no pregnancy than it was in pregnant women in the age group of 40–49 years (41.4% vs 17.4%, respectively,  $p = 0.020$ ). The COVID-19 symptoms were further combined and categorized based on the organ system (S1 Table). In general, respiratory symptoms were significantly higher in pregnant versus women with no pregnancy in the age group of 18–29 years (52.9% vs 47.7%, respectively,  $p = 0.050$ ), and 30–39 years (52.9% vs 47.1%, respectively,  $p = 0.023$ ). In addition, musculoskeletal symptoms were more common in pregnant women than women with no pregnancy in age group 18–29 years (33.2% vs 26.8%, respectively,  $p = 0.007$ ).



**Table 3. Comparison of severity of symptoms by pregnancy status in each age group.**

| Variables                            | Pregnant, 18–29 years (n = 380) | No pregnancy, 18–29 years (n = 5549) | P value | Pregnant, 30–39 years (n = 393) | No pregnancy 30–39 years (n = 6831) | P value | Pregnant, 40–49 years (n = 26) | No pregnancy, 40–49 years (n = 3729) | P value |
|--------------------------------------|---------------------------------|--------------------------------------|---------|---------------------------------|-------------------------------------|---------|--------------------------------|--------------------------------------|---------|
| Asymptomatic<br>n = 4920             | 78(20.5)                        | 1689(30.4)                           | <0.001  | 86(21.9)                        | 1993(29.2)                          | 0.002   | 9(34.6)                        | 1065 (28.6)                          | 0.50    |
| Symptomatic<br>n = 11988             | 302(76.5)                       | 3860(69.6)                           | <0.001  | 307(78.1)                       | 4838(70.8)                          | 0.002   | 17 (65.4)                      | 2664 (71.4)                          | 0.50    |
| Mild to moderate symptoms, n = 10628 |                                 |                                      |         |                                 |                                     |         |                                |                                      |         |
| Fever                                | 144(43.6)                       | 2128(41.4)                           | 0.42    | 153(42.4)                       | 2540(40.8)                          | 0.46    | 4(17.4)                        | 1410(41.4)                           | 0.020   |
| Cough                                | 126(38.2)                       | 1681(32.7)                           | 0.040   | 134(37.1)                       | 2028(32.3)                          | 0.056   | 6(26.1)                        | 1173(34.4)                           | 0.40    |
| Sore throat                          | 63(19.1)                        | 1319(25.7)                           | 0.008   | 102(28.3)                       | 1462(23.3)                          | 0.030   | 6(26.1)                        | 806(23.6)                            | 0.78    |
| Headache                             | 99(30.0)                        | 1668(32.5)                           | 0.36    | 130(36.0)                       | 1959(31.2)                          | 0.054   | 5(21.7)                        | 1017(29.8)                           | 0.40    |
| Muscle or joint pain                 | 98(29.7)                        | 1251(24.3)                           | 0.029   | 110(30.5)                       | 1710(27.2)                          | 0.18    | 3(13.0)                        | 944(27.7)                            | 0.12    |
| Diarrhea                             | 15(4.5)                         | 287(5.6)                             | 0.42    | 16(4.4)                         | 373(5.9)                            | 0.24    | 0(0.0)                         | 195 (5.7)                            | 0.24    |
| Chills                               | 31(9.4)                         | 347(6.8)                             | 0.067   | 24(6.6)                         | 466(7.4)                            | 0.59    | 2(8.7)                         | 256 (7.5)                            | 0.83    |
| Abdominal pain                       | 25(7.6)                         | 300(5.8)                             | 0.20    | 24(6.6)                         | 345(5.5)                            | 0.35    | 0(0.0)                         | 197(5.8)                             | 0.24    |
| Severe symptoms, n = 1360            |                                 |                                      |         |                                 |                                     |         |                                |                                      |         |
| Shortness of breath                  | 50(13.2)                        | 409(7.4)                             | <0.001  | 32(8.1)                         | 546(8.0)                            | 0.92    | 3(11.5)                        | 320 (8.6)                            | 0.59    |

Table comparing COVID-19 symptoms between pregnant women and women with no pregnancy, within the age groups of 18–29 years, 30–39 years, and 40–49 years of age.

<https://doi.org/10.1371/journal.pgph.0000891.t003>

### Association between pregnancy and symptomatic COVID-19

After multivariable logistic regression, pregnancy was associated with higher odds of symptomatic COVID-19 (OR 1.41, 95% CI 1.18–1.68,  $p < 0.01$ ). Further, pregnancy was associated with higher odds of shortness of breath (OR 1.29, 95% CI 1.02–1.63,  $p = 0.03$ ) (Table 4). In stepwise logistic regression models, with  $p = 0.3$  for removing a variable from the model, pregnancy, diabetes, CVD and region of origin were potential predictors of both COVID-19 symptom status and shortness of breath in women of childbearing age, but age was dropped from the models (S2 Table). There was also no association with age of the women of childbearing age when age was categorized to less than and at least 35 years of age (S2 Table). This lack of association between age and COVID-19 symptoms was most likely because the women in this study were mostly in the narrow age range of 18–39 years, especially those who were pregnant. Therefore, the effect of age observed in other studies with participants without pregnancy was not observed.

### Association between pregnancy and the number of COVID-19 symptoms

After multivariable Poisson regression, pregnancy was associated with a higher count of symptoms (IRR 1.03, 95% CI 0.98–1.08,  $p = 0.31$ ), although with weak evidence against the null hypothesis (Table 5).

## Discussion

In this population based cross sectional study, we found that, in a diverse Middle Eastern population, pregnant women were more likely to report symptomatic COVID-19 compared to women with no pregnancy. Moreover, pregnant women had a higher proportion of shortness of breath, compared to women who were not pregnant. In multivariable logistic regressions,

**Table 4. Association between pregnancy and symptomatic COVID-19 –multivariable logistic regression.**

| Variable                   | Symptomatic#1 |         |            | Shortness of breath #2 |         |            |
|----------------------------|---------------|---------|------------|------------------------|---------|------------|
|                            | OR            | P-value | 95% CI     | OR                     | P-value | 95% CI     |
| Pregnancy                  | 1.41          | 0.00    | 1.18–1.68  | 1.29                   | 0.03    | 1.02–1.63  |
| Age                        | 1.00          | 0.17    | 1.00–1.01  | 1.01                   | 0.12    | 1.00–1.01  |
| CVD                        | 1.89          | 0.00    | 1.49–2.38  | 1.94                   | 0.00    | 1.48–2.50  |
| Diabetes                   | 1.72          | 0.00    | 1.37–2.15  | 1.44                   | 0.01    | 1.12–1.86  |
| Region of Origin           | Base          |         |            |                        |         |            |
| Asian                      | Base          |         |            |                        |         |            |
| Middle east & north Africa | 1.62          | 0.00    | 1.51–1.74  | 1.79                   | 0.00    | 1.59–2.01  |
| South America              | 0.45          | 0.07    | 0.19–1.06  | 1.63                   | 0.51    | 0.38–7.01  |
| Sub-Saharan Africa         | 0.53          | 0.00    | 0.46–0.62  | 0.60                   | 0.01    | 0.41–0.89  |
| Australasia                | 5.61          | 0.10    | 0.73–43.27 | 2.48                   | 0.24    | 0.54–11.32 |
| North America & Europe     | 1.65          | 0.00    | 1.23–2.22  | 0.75                   | 0.33    | 0.42–1.35  |

A multivariable logistic regression table with two models:

#1 –A singles multivariable logistic regression model with the outcome of symptomatic COVID-19 (yes/no). Model statistics: Number of observations = 16 907, LR Chi = 429.03, P-value = 0.0000, Pseudo R2 = 0.021, hatsq (from linktest) = 0.162, area under the ROC curve = 0.60

#2 –A singles multivariable logistic regression model with the outcome of shortness of breath (yes/no). Model statistics: Number of observations = 16 907, LR Chi = 179.16, P-value = 0.0000, Pseudo R2 = 0.024, hatsq (from linktest) = 0.710, area under the ROC curve = 0.62

<https://doi.org/10.1371/journal.pgph.0000891.t004>

pregnancy was associated with 1.41-fold higher odds of having symptomatic COVID-19 and almost 1.3-fold higher odds of reporting shortness of breath. Moreover, a multivariable Poisson regression analysis showed that pregnant women were more likely to have a higher number of symptoms compared to women with no pregnancy.

We found higher odds of symptomatic COVID-19 and shortness of breath in pregnant women compared to women with no pregnancy of the same age. Although there are some contrasting results from other studies [7, 20, 21], our findings add to a growing body of evidence that suggests that pregnant women are vulnerable to severe COVID-19 [4, 5, 22, 23], albeit from a region where such data have been scarce to date. In one meta-analysis of 67 271

**Table 5. Association between the count of symptoms and pregnancy–multivariable Poisson regression.**

|                            | Number of symptoms |         |           |
|----------------------------|--------------------|---------|-----------|
|                            | IRR                | P-value | 95% CI    |
| Pregnancy                  | 1.03               | 0.31    | 0.98–1.08 |
| Age (overall)              | 1.00               | 0.16    | 1.00–1.00 |
| CVD                        | 1.24               | 0.00    | 1.17–1.31 |
| Diabetes                   | 1.19               | 0.00    | 1.13–1.25 |
| Region of origin           | Base               |         |           |
| Asia                       | Base               |         |           |
| Middle east & north Africa | 1.47               | 0.00    | 1.44–1.50 |
| South America              | 0.93               | 0.67    | 0.66–1.31 |
| Sub-Saharan Africa         | 0.68               | 0.00    | 0.64–0.74 |
| Australasia                | 1.76               | 0.00    | 1.28–2.41 |
| North America & Europe     | 1.12               | 0.01    | 1.02–1.23 |

A multivariable Poisson regression table with the outcome being the number of symptoms and the exposure being pregnancy having adjusted for the same confounders.

<https://doi.org/10.1371/journal.pgph.0000891.t005>



women, pregnant women and women in the postpartum group were twice more likely to be admitted to ICU, to have mechanical ventilation and to require extracorporeal membrane oxygenation [4]. In another study from the US CDC, of 461 825 women, pregnant women three times more likely to be admitted to ICU, two-and-a-half times to receive extracorporeal membrane oxygenation, three times more likely to need mechanical ventilation and almost twice likely to die from COVID-19. In contrast, one systematic review concluded that clinical features of pregnant women with COVID-19 did not vary from those of women with no pregnancy [20]. However, this review had several limitations including a very small sample size of 114 total participants and included poor-quality studies. Similarly, two other older reviews suggested that there was no difference in COVID-19 presentation between women with and without pregnancy [21], and that pregnant women were less likely to have cough, sore throat, headache and diarrhea than those were not pregnant [7]. Notably, these older reviews included small and poorly designed studies. Taken together, our findings and those of existing studies suggest a worse course of symptoms of COVID-19 in pregnancy.

In multivariable logistic regression models, age, in its continuous form or categorized, did not seem to affect the observed associations between pregnancy and COVID-19 symptoms. Data on the association between COVID-19 symptoms and pregnancy in different age groups remains scarce. One cross sectional study in Saudi Arabia reported that women with advanced maternal age were more likely to be symptomatic, with a greater acute respiratory illness median score [24]. However, the study did not include women without pregnancy, thus, more research is needed.

Several physiological changes during pregnancy may worsen the course of COVID-19 and therefore result in severe symptoms. A more symptomatic course of the disease could be caused by changes in the respiratory system during pregnancy that can impair the protective functions of the lungs [25]. Also, high levels of estrogen and progesterone hormones during pregnancy induce the upper part of the respiratory tract to swell, which increases the susceptibility of severe COVID-19 infection. Lastly, pregnancy is a hypercoagulable state, and this makes pregnant women more vulnerable to a severe course of COVID-19, where coagulation dysfunction is a hallmark of poor disease outcomes [26, 27].

There are several limitations in our study. Firstly, data collection from participants was done through phone calls, to reduce the spread of COVID-19 at those early times in the pandemic. However, there is no basis to believe that this subjective reporting of symptoms was differential, such that it was more likely in either pregnant women or women with no pregnancy. Therefore, if this subjective assessment affected the study, it would most likely have biased the odds ratios towards the null, and the expected effect if objective assessment was done, would probably show higher odds ratios. Additionally, information about the gestational age of the participants was not measured, which may have affected the symptomology of COVID-19, as immunological and physiological changes vary throughout between pregnancy trimesters. Further, dyspnea is a predominant clinical presentation in severe COVID-19, but also in most pregnancies during their third trimester [28]. Further studies investigating the effect of COVID-19 infection on pregnancy in different trimesters are therefore needed. There is a chance that pregnant women were more likely to do the PCR test, compared with women without pregnancy, as they were in contact with the healthcare system at the time. However, this study compared symptoms in the women who had PCR tests by pregnancy status, and therefore would not have been affected by a higher propensity of pregnant women to get PCRs. It is also likely that women who were pregnant were more likely to monitor their symptoms, and report them, compared to women without pregnancy, especially when not severe. This may have affected the findings of the study and resulted in higher odds of symptom reporting in pregnancy. An important question which we were not able to answer in this

research is the effect of COVID-19 on pregnancy outcomes, and future research may be needed in this setting. Despite this, this study allowed us to explore the symptoms of COVID-19 infection across a multicultural cohort, using a large sample with a diversity of participants.

## Conclusion

Our findings suggest that, in a multinational cohort in Qatar, pregnant women are more likely to have symptomatic COVID-19, especially shortness of breath, compared to women without pregnancy of the same age. Policies are required to ensure that women who are pregnant receive more follow ups during public health emergencies such as COVID-19, while limiting unnecessary contact with the healthcare personnel. Telehealth could be an option, which can be used to monitor the severe symptoms in pregnant women. Another consideration is the need to explore interventions that can help in treating symptoms and preventing deterioration in pregnant women once they present with COVID-19. Finally prioritizing women who are pregnant for preventive measures such as vaccinations may help in reducing unnecessary morbidity from COVID-19 infection in women who are pregnant.

## Supporting information

**S1 Text. STROBE checklist.** Checklist showing the Strengthening the Reporting of Observational Studies in Epidemiology (STROBE).  
(DOCX)

**S1 Fig. DAG for confounders of pregnancy and COVID-19 symptoms.** Directed acyclic graphs (DAG) to identify potential confounders to adjust for in the association between pregnancy and COVID-19, and in this case, only age was needed to control for confounding.  
(TIF)

**S1 Table. Comparison of organ systems-based symptoms by pregnancy status in each age group.** A table comparing organ-based systems, including respiratory, gastrointestinal, musculoskeletal, and systemic systems by pregnancy status in each age group.  
(DOCX)

**S2 Table. Stepwise logistic regression for association between symptomatic COVID-19 and pregnancy.** A Stepwise logistic regression model with COVID-19 symptoms (yes/no) as the outcome.  
(DOCX)

## Acknowledgments

We acknowledge the Ministry of Public Health of Qatar (MoPH) for the data used in this study and the Population Medicine Department at the College of Medicine at Qatar University for methodological support.

## Author Contributions

**Conceptualization:** Alla' K. Al-Qassem, Ammar B. Humaidi, Amna K. Al-Kuwari, Elham M. Hasan, Nosaiba H. Yakti, Rakan M. Al-Hathal, Tawanda Chivese.

**Data curation:** Ammar B. Humaidi, Omran A. H. Musa, Tawanda Chivese.

**Formal analysis:** Alla' K. Al-Qassem, Ammar B. Humaidi, Nosaiba H. Yakti, Rakan M. Al-Hathal, Suhail Doi, Tawanda Chivese.

**Investigation:** Alla' K. Al-Qassem, Ammar B. Humaidi, Nosaiba H. Yakti, Rakan M. Al-Hathal, Tawanda Chivese.

**Methodology:** Alla' K. Al-Qassem, Ammar B. Humaidi, Amna K. Al-Kuwari, Elham M. Hasan, Nosaiba H. Yakti, Rakan M. Al-Hathal, Tawanda Chivese.

**Project administration:** Tawanda Chivese.

**Resources:** Alla' K. Al-Qassem, Ammar B. Humaidi, Nosaiba H. Yakti, Rakan M. Al-Hathal.

**Software:** Alla' K. Al-Qassem, Ammar B. Humaidi, Elham M. Hasan, Nosaiba H. Yakti, Rakan M. Al-Hathal, Tawanda Chivese.

**Supervision:** Tawanda Chivese.

**Validation:** Tawanda Chivese.

**Visualization:** Alla' K. Al-Qassem, Ammar B. Humaidi, Amna K. Al-Kuwari, Elham M. Hasan, Nosaiba H. Yakti, Rakan M. Al-Hathal.

**Writing – original draft:** Alla' K. Al-Qassem, Ammar B. Humaidi, Amna K. Al-Kuwari, Elham M. Hasan, Nosaiba H. Yakti, Rakan M. Al-Hathal, Tawanda Chivese.

**Writing – review & editing:** Alla' K. Al-Qassem, Ammar B. Humaidi, Amna K. Al-Kuwari, Elham M. Hasan, Nosaiba H. Yakti, Rakan M. Al-Hathal, Devendra Bansal, Elmoubashar Abu Baker Abd Farag, Hamad E. Al-Romaihi, Mohammed H. J. Al-Thani, Omran A. H. Musa, Suhail Doi, Tawanda Chivese.

## References

1. Kourtis AP, Read JS, Jamieson DJ. Pregnancy and Infection. *N Engl J Med* 2014 Jun 05; 370(23):2211–2218. <https://doi.org/10.1056/NEJMra1213566> PMID: 24897084
2. Tay MZ, Poh CM, Rénia L, MacAry PA, Ng Lisa FP. The trinity of COVID-19: immunity, inflammation and intervention. *Nature Reviews. Immunology*. 2020 Jun; 20(6):363–374. <https://doi.org/10.1038/s41577-020-0311-8> PMID: 32346093
3. Wei SQ, Bilodeau-Bertrand M, Liu S, Auger N. The impact of COVID-19 on pregnancy outcomes: a systematic review and meta-analysis. *CMAJ*. 2021 Apr 19; 193(16):E540–E548. <https://doi.org/10.1503/cmaj.202604> PMID: 33741725
4. Allotey J, Stallings E, Bonet M, Yap M, Chatterjee S, Kew T, et al. Clinical manifestations, risk factors, and maternal and perinatal outcomes of coronavirus disease 2019 in pregnancy: living systematic review and meta-analysis. *BMJ: British Medical Journal (Online)*. 2020 Sep 01; 370. <https://doi.org/10.1136/bmj.m3320> PMID: 32873575
5. Lassi ZS, Ana A, Das JK, Salam RA, Padhani ZA, Irfan O, et al. A systematic review and meta-analysis of data on pregnant women with confirmed COVID-19: Clinical presentation, and pregnancy and perinatal outcomes based on COVID-19 severity. *J Glob Health*. 2021 Jun 30. <https://doi.org/10.7189/jogh.11.05018> PMID: 34221361
6. Pettiroso E, Giles M, Cole S, Rees M. COVID-19 and pregnancy: A review of clinical characteristics, obstetric outcomes and vertical transmission. *Aust N Z J Obstet Gynaecol*. 2020 Aug 10; 60(5):640–659. <https://doi.org/10.1111/ajo.13204> PMID: 32779193
7. Jafari M, Pormohammad A, Neshin SA, Ghorbani S, Bose D, Alimohammadi S, et al. Clinical characteristics and outcomes of pregnant women with COVID-19 and comparison with control patients: A systematic review and meta-analysis. *Rev Med Virol*. 2021; 31(5):1–16. <https://doi.org/10.1002/rmv.2208> PMID: 33387448
8. Chivese T, Matizanadzo JT, Musa OA, Hindy G, Furuya-Kanamori L, Islam N, et al. The prevalence of adaptive immunity to COVID-19 and reinfection after recovery—a comprehensive systematic review and meta-analysis. *Pathogens and Global Health*. 2022; 116(5):269–81. <https://doi.org/10.1080/20477724.2022.2029301> PMID: 35099367
9. Hacisuleyman E, Hale C, Saito Y, Blachere NE, Bergh M, Conlon EG, et al. Vaccine breakthrough infections with SARS-COV-2 variants. *New England Journal of Medicine*. 2021; 384(23):2212–8. <https://doi.org/10.1056/NEJMoa2105000> PMID: 33882219

10. Talukder A, Razu SR, Alif SM, Rahman MA, Islam SM. Association between symptoms and severity of disease in hospitalised novel coronavirus (COVID-19) patients: A systematic review and meta-analysis. *Journal of Multidisciplinary Healthcare*. 2022; 15:1101–10. <https://doi.org/10.2147/JMDH.S357867> PMID: 35592814
11. Zhang N, Xie T, Ning W, He R, Zhu B, Mao Y. The severity of COVID-19 and its determinants: A systematic review and meta-analysis in China. *Sustainability*. 2021; 13(9):5305. <https://doi.org/10.3390/su13095305>
12. Clinical Spectrum of SARS-CoV-2 Infection [Internet]. U.S. Department of Health and Human Services; [cited 2023 Oct 4]. Available from: <https://covid19treatmentguidelines.nih.gov/overview/management-of-covid-19/>.
13. Snoj J. Population of Qatar by nationality in 2019 [Internet]. 2021 [cited 2023 Oct 4]. Available from: <http://priyadsouza.com/population-of-qatar-by-nationality>.
14. Greenland S, Pearl J, Robins JM. Causal diagrams for epidemiologic research. *Epidemiology*. 1999; 10(1):37–48. <https://doi.org/10.1097/00001648-199901000-00008> PMID: 9888278
15. Lee PH, Burstyn I. Identification of confounder in epidemiologic data contaminated by measurement error in covariates. *BMC Medical Research Methodology*. 2016; 16(1). <https://doi.org/10.1186/s12874-016-0159-6> PMID: 27193095
16. Romero K, Reissig D, Petereit-Haack G, Schmauder S, Nienhaus A, Seidler A. The isolated effect of age on the risk of COVID-19 severe outcomes: a systematic review with meta-analysis. *BMJ Glob Health*. 2021; 6(12): e006434. <https://doi.org/10.1136/bmjgh-2021-006434> PMID: 34916273
17. Fathi M, Vakili K, Sayehmiri F, Mohamadkhani A, Hajiesmaeili M, Rezaei-Tavirani M, et al. The prognostic value of comorbidity for the severity of COVID-19: A systematic review and meta-analysis study. *PLoS One*. 2021; 16(2):e0246190. <https://doi.org/10.1371/journal.pone.0246190> PMID: 33592019
18. Raharja A, Tamara A, Kok LT. Association between ethnicity and severe Covid-19 disease: A systematic review and meta-analysis. *bioRxiv*. 2020. <https://doi.org/10.1007/s40615-020-00921-5> PMID: 33180278
19. Stata Press. *Stata Statistical Software*. Stata Corporation, College Station, 2016.
20. Yang Z, Wang M, Zhu Z, Liu Y. Coronavirus disease 2019 (COVID-19) and pregnancy: a systematic review. *J Matern Fetal Neonatal Medicine*. 2022; 35(8):1619–1622. <https://doi.org/10.1080/14767058.2020.1759541> PMID: 32354293
21. Di Toro F, Gjoka M, Di Lorenzo G, De Santo D, De Seta F, Maso G, et al. Impact of COVID-19 on maternal and neonatal outcomes: a systematic review and meta-analysis. *Clin Microbiol Infect*. 2021 Jan; 27(1):36–46. <https://doi.org/10.1016/j.cmi.2020.10.007> Epub 2020 Nov 2. PMID: 33148440; PMCID: PMC7605748.
22. Zambrano LD, Ellington S, Strid P, Galang RR, Oduyebo T, Tong VT, et al. Update: Characteristics of symptomatic women of reproductive age with laboratory-confirmed SARS-CoV-2 infection by pregnancy status—United States, January 22–October 3, 2020. *MMWR Morb Mortal Wkly Rep*. 2020 Nov 6; 69(44):1641–7. <https://doi.org/10.15585/mmwr.mm6944e3> PMID: 33151921
23. Ellington S, Strid P, Tong VT, Woodworth K, Galang RR, Zambrano LD, et al. Characteristics of Women of Reproductive Age with Laboratory-Confirmed SARS-CoV-2 Infection by Pregnancy Status—United States, January 22–June 7, 2020. *MMWR Morb Mortal Wkly Rep*. 2020 Jun 26; 69(25):769–775. <https://doi.org/10.15585/mmwr.mm6925a1> PMID: 32584795
24. Shams T, Alhashemi H, Madkhali A, Noorelahi A, Allarakia S, Faden Y, et al. Comparing pregnancy outcomes between symptomatic and asymptomatic COVID-19 positive unvaccinated women: Multicenter study in Saudi Arabia. *J Infect Public Health*. 2022 Aug; 15(8):845–852. <https://doi.org/10.1016/j.jiph.2022.06.002> PMID: 35779468
25. Wastnedge EA, Reynolds RM, van Boeckel SR, Stock SJ, Denison FC, Maybin JA, et al. Pregnancy and covid-19. *Physiological Reviews*. 2021; 101(1):303–18. <https://doi.org/10.1152/physrev.00024.2020> PMID: 32969772
26. Fei Y, Tang N, Liu H, Cao W. Coagulation Dysfunction. *Arch Pathol Lab Med*. 2020 Oct 1; 144(10):1223–1229. <https://doi.org/10.5858/arpa.2020-0324-SA> PMID: 32551814.
27. Levi M, Thachil J, Iba T, Levy JH. Coagulation abnormalities and thrombosis in patients with COVID-19. *Lancet Haematology*. 2020; 7(6):e438–40. [https://doi.org/10.1016/S2352-3026\(20\)30145-9](https://doi.org/10.1016/S2352-3026(20)30145-9) PMID: 32407672
28. Reeder CF, Hambright AA, Fortner KB. Dyspnea in pregnancy: A case report of a third trimester mediastinal mass in pregnancy. *Am J Case Report*. 2018; 19:1536–40. <https://doi.org/10.12659/AJCR.910725> PMID: 30591704
